# Supplementary material for: Clinical Efficacy of Hypofractionated Proton Beam Therapy for Intrahepatic Cholangiocarcinoma
Source: MDPI journal article supplement (doi:10.3390/cancers14225561), 2022-11-12
Supplement: s1 [file s1]

## Supplementary Materials

### Supplementary Figures

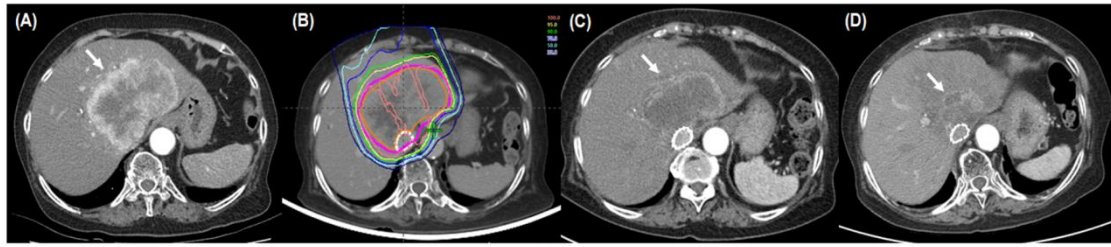

**Figure S1.** An example of proton beam therapy (PBT) for intrahepatic cholangiocarcinoma (IHCC). (A) Computed tomography (CT) scans at diagnosis showing the tumor (arrow). (B) Plan CT scans for proton beam therapy (PBT) showing dose line. (C and D) CT scans at 6 and 12 months, respectively, after PBT showing marked shrinkage of the tumor (arrow).

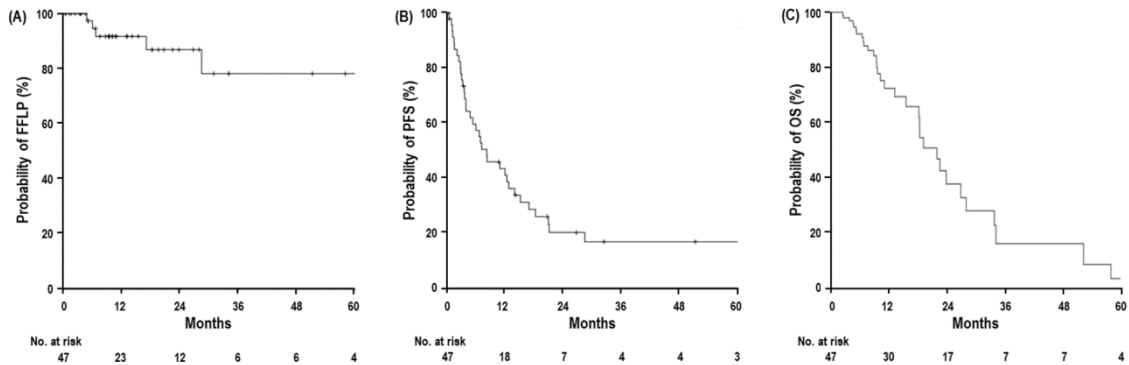

**Figure S2.** Freedom from local progression (FFLP) (A), progression-free survival (PFS) (B), and overall survival (OS) (C) curves in intrahepatic cholangiocarcinoma patients treated with proton beam therapy.

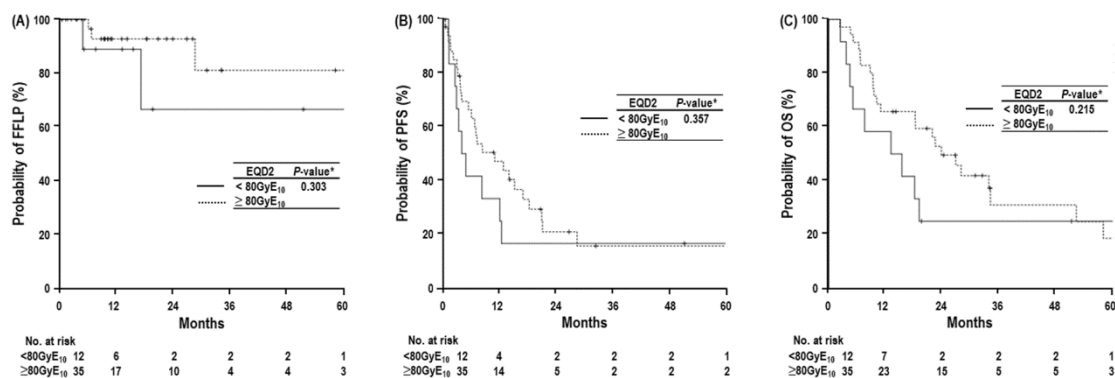

**Figure S3.** Freedom from local progression (FFLP) (A), progression-free survival (PFS) (B), and overall survival (OS) (C) according to total dose (EQD2) of proton beam therapy.

Abbreviations: EQD2, equivalent dose in 2 Gy fractions ( $\text{EQD2} = \text{total dose} \times [(\text{fraction dose} + \alpha/\beta)/(2 + \alpha/\beta)]$ ,  $\alpha/\beta = 10$ ); and GyE, gray equivalent ( $\text{GyE} = \text{proton physical dose [in gray]} \times \text{relative biologic effectiveness [1.1]}$ ).

\*log-rank test.

## Supplementary Tables

Table S1. Treatment modalities prior or after proton beam therapy (PBT)

| Details of treatment modalities |                       | Distribution, n (%) |
|---------------------------------|-----------------------|---------------------|
| Pre-Tx to PBT site(s)           | No                    | 26 (55.3)           |
|                                 | Yes                   | 21 (44.7)           |
|                                 | SAT*                  | 20 (42.6)           |
|                                 | TACE                  | 1 (2.1)             |
| Post-Tx after PBT               | No                    | 23 (48.9)           |
|                                 | Yes                   | 24 (51.1)           |
|                                 | SAT <sup>†</sup>      | 20 (42.6)           |
|                                 | SAT <sup>†</sup> + SR | 3 (6.4)             |
|                                 | LT                    | 1 (2.1)             |

Abbreviations: n, number of patients; Tx, treatment; TACE, transarterial chemoembolization; SAT, systemic anticancer therapy; SR, surgical resection; and LT, liver transplantation.

\*Gemcitabine and cisplatin (n=13), gemcitabine, cisplatin and pembrolizumab (n=2), gemcitabine (n=2), capecitabine and cisplatin (n=1), oxaliplatin, irinotecan and tegafur/gimeracil/oteracil (n=1), and gemcitabine, cisplatin and albumin-bound paclitaxel (n=1).

<sup>†</sup>Gemcitabine and cisplatin (n=15), gemcitabine (n=3), gemcitabine, cisplatin and albumin-bound paclitaxel (n=2), capecitabine (n=1), 5-fluorouracil, irinotecan, leucovorin and oxaliplatin (n=1), and nivolumab (n=1).

Table S2. Summary of studies intrahepatic cholangiocarcinoma treated with radiotherapy

| Author              | Year | Study design | Type of RT | n  | Total dose<br>(Gray/fractions) | FFLP                       | OS                                              | AE rate* |
|---------------------|------|--------------|------------|----|--------------------------------|----------------------------|-------------------------------------------------|----------|
| Zeng et al.[1]      | 2006 | Retro        | RT         | 38 | 30 - 60 / 15 - 30              | -                          | 50.1% (1yr)<br>11.8% (2yr)                      | 5.3%     |
|                     |      |              | No RT      | 37 | -                              | -                          | 24.8% (1yr)<br>5.5% (2yr)                       | -        |
| Chen et al.[2]      | 2010 | Retro        | RT         | 35 | 30 - 60 / 15 - 30              | -                          | 9.5m (med)<br>38.5% (1yr)<br>16.4% (2yr)        | 2.9%     |
|                     |      |              | No RT      | 49 | -                              | -                          | 5.1 (med)<br>9.6% (1yr)<br>4.9% (2yr)           | -        |
| Kim et al.[3]       | 2013 | Retro        | CRT        | 25 | 25 - 60 / 12 - 30              | -                          | 9.3m (med)<br>30.4% (1yr)                       | 24.0%    |
|                     |      |              | SAT        | 67 |                                | -                          | 6.2m (med)<br>22.4% (1yr)                       | 10.4%    |
| Tse et al.[4]       | 2008 | Phase I      | SBRT       | 10 | 28.2 - 48 / 6                  | 65% (1yr)                  | 15m (med)                                       | 12%      |
| Barney et al.[5]    | 2012 | Retro        | SBRT       | 10 | 45 - 60 / 3 - 5                | 100% (1yr)                 | 15.5m (med)<br>73% (1yr)                        | 20%      |
| Jung et al.[6]      | 2014 | Retro        | SBRT       | 58 | 15 - 60 / 1 - 5                | 85% (1yr)<br>75% (2yr)     | 10m (med)<br>45% (1yr)<br>20% (2yr)             | 10%      |
| Mahadevan et al.[7] | 2015 | Retro        | SBRT       | 34 | 24 - 45 / 3 - 5                | 88% (1yr)                  | 17m (med)<br>58% (1yr)<br>31% (2yr)             | 12%      |
| Sandler et al.[8]   | 2016 | Retro        | SBRT       | 31 | 25 - 50 / 5                    | 78% (1yr)<br>47% (2yr)     | 15.7m (med)<br>59% (1yr)<br>33% (2yr)           | 16%      |
| Gkika et al.[9]     | 2017 | Retro        | SBRT       | 37 | 21 - 66 / 3 - 12               | 78% (1yr)<br>58% (2yr)     | 14m (med)<br>57% (1yr)<br>25% (2yr)             | 9%       |
| Tao et al.          | 2016 | Retro        | IMRT/PBT   | 79 | 30 – 100 / 3 - 30              | 81% (1yr)                  | 30m (med)<br>87% (1yr)<br>61% (2yr)             | 6.3%     |
| Smart et al.[10]    | 2020 | Retro        | HF-RT/PBT  | 66 | 37.5 – 67.5 / 15               | 84% (2yr)                  | 58% (2yr)                                       | 11%      |
| Makita et al.[11]   | 2014 | Retro        | PBT        | 18 | 50.6 – 80 / 15 - 40            | 67.7% (1yr)                | 49.0% (1yr)                                     | 22.2%    |
| Onkawa et al.[12]   | 2015 | Retro        | PBT        | 20 | 55 – 79.2 / 10 - 16            | 88% (1yr)<br>60% (2yr)     | 27.5m <sup>†</sup> / 9.6m <sup>‡</sup><br>(med) | 0%       |
| Hong et al. [13]    | 2016 | Phase II     | PBT        | 37 | 15.1 – 67.5 / 15               | 94.1% (2yr)                | 22.5m (med)<br>46.5% (2yr)                      | 7.7%     |
| Hung et al.[14]     | 2019 | Retro        | PBT        | 30 | 39.6 – 73.4 / 10 - 24          | 88% (1yr)                  | 19.3m (m)<br>83% (1yr)<br>32% (2yr)             | 17.4%    |
| Shimizu et al.[15]  | 2019 | Retro        | PBT        | 42 | 46.6 – 74 / 12 - 37            | 97.3% (1yr)<br>68.4% (2yr) | 15.0m (med)<br>60.3% (1yr)<br>41.4% (2yr)       | 0%       |
| Present study       | 2022 | Retro        | PBT        | 47 | 45 – 80 / 10                   | 91.7% (1yr)<br>86.9% (2yr) | 21.9m (med)<br>63.8% (1yr)                      | 8.5%     |

Abbreviations: n, number of patients; RT, radiotherapy; FFLP, freedom from local progression; OS, overall survival; AE, adverse events; Retro, retrospective; CRT, chemoradiotherapy; SBRT, stereotactic body RT; IMRT, intensity-modulated RT; HF-RT, hypofractionated RT; PBT, proton beam therapy; med, median; yr, year; the others are same as Table S1.

\*rate of  $\geq$  grade 3 adverse events or major adverse events.

†Curative group

‡Palliative group

## References

1. Zeng, Z.C.; Tang, Z.Y.; Fan, J.; Zhou, J.; Qin, L.X.; Ye, S.L.; Sun, H.C.; Wang, B.L.; Li, D.; Wang, J.H.; et al. Consideration of the role of radiotherapy for unresectable intrahepatic cholangiocarcinoma: a retrospective analysis of 75 patients. *Cancer J* **2006**, *12*, 113-122.
2. Chen, Y.X.; Zeng, Z.C.; Tang, Z.Y.; Fan, J.; Zhou, J.; Jiang, W.; Zeng, M.S.; Tan, Y.S. Determining the role of external beam radiotherapy in unresectable intrahepatic cholangiocarcinoma: a retrospective analysis of 84 patients. *BMC Cancer* **2010**, *10*, 492, doi:10.1186/1471-2407-10-492.
3. Kim, Y.I.; Park, J.W.; Kim, B.H.; Woo, S.M.; Kim, T.H.; Koh, Y.H.; Lee, W.J.; Kim, C.M. Outcomes of concurrent chemoradiotherapy versus chemotherapy alone for advanced-stage unresectable intrahepatic cholangiocarcinoma. *Radiat Oncol* **2013**, *8*, 292, doi:10.1186/1748-717X-8-292.
4. Tse, R.V.; Hawkins, M.; Lockwood, G.; Kim, J.J.; Cummings, B.; Knox, J.; Sherman, M.; Dawson, L.A. Phase I study of individualized stereotactic body radiotherapy for hepatocellular carcinoma and intrahepatic cholangiocarcinoma. *J Clin Oncol* **2008**, *26*, 657-664, doi:10.1200/JCO.2007.14.3529.
5. Barney, B.M.; Olivier, K.R.; Miller, R.C.; Haddock, M.G. Clinical outcomes and toxicity using stereotactic body radiotherapy (SBRT) for advanced cholangiocarcinoma. *Radiat Oncol* **2012**, *7*, 67, doi:10.1186/1748-717X-7-67.
6. Jung, D.H.; Kim, M.S.; Cho, C.K.; Yoo, H.J.; Jang, W.I.; Seo, Y.S.; Paik, E.K.; Kim, K.B.; Han, C.J.; Kim, S.B. Outcomes of stereotactic body radiotherapy for unresectable primary or recurrent cholangiocarcinoma. *Radiat Oncol J* **2014**, *32*, 163-169, doi:10.3857/roj.2014.32.3.163.
7. Mahadevan, A.; Dagoglu, N.; Mancias, J.; Raven, K.; Khwaja, K.; Tseng, J.F.; Ng, K.; Enzinger, P.; Miksad, R.; Bullock, A.; et al. Stereotactic Body Radiotherapy (SBRT) for Intrahepatic and Hilar Cholangiocarcinoma. *J Cancer* **2015**, *6*, 1099-1104, doi:10.7150/jca.13032.
8. Sandler, K.A.; Veruttipong, D.; Agopian, V.G.; Finn, R.S.; Hong, J.C.; Kaldas, F.M.; Sadeghi, S.; Busuttil, R.W.; Lee, P. Stereotactic body radiotherapy (SBRT) for locally advanced extrahepatic and intrahepatic cholangiocarcinoma. *Adv Radiat Oncol* **2016**, *1*, 237-243, doi:10.1016/j.adro.2016.10.008.
9. Gkika, E.; Hallauer, L.; Kirste, S.; Adebahr, S.; Bartl, N.; Neeff, H.P.; Fritsch, R.; Brass, V.; Nestle, U.; Grosu, A.L.; et al. Stereotactic body radiotherapy (SBRT) for locally advanced intrahepatic and extrahepatic cholangiocarcinoma. *BMC Cancer* **2017**, *17*, 781, doi:10.1186/s12885-017-3788-1.
10. Smart, A.C.; Goyal, L.; Horick, N.; Petkovska, N.; Zhu, A.X.; Ferrone, C.R.; Tanabe, K.K.; Allen, J.N.; Drapek, L.C.; Qadan, M.; et al. Hypofractionated Radiation Therapy for Unresectable/Locally Recurrent Intrahepatic Cholangiocarcinoma. *Ann Surg Oncol* **2020**, *27*, 1122-1129, doi:10.1245/s10434-019-08142-9.
11. Makita, C.; Nakamura, T.; Takada, A.; Takayama, K.; Suzuki, M.; Ishikawa, Y.; Azami,

- Y.; Kato, T.; Tsukiyama, I.; Kikuchi, Y.; et al. Clinical outcomes and toxicity of proton beam therapy for advanced cholangiocarcinoma. *Radiat Oncol* **2014**, *9*, 26, doi:10.1186/1748-717X-9-26.
12. Ohkawa, A.; Mizumoto, M.; Ishikawa, H.; Abei, M.; Fukuda, K.; Hashimoto, T.; Sakae, T.; Tsuboi, K.; Okumura, T.; Sakurai, H. Proton beam therapy for unresectable intrahepatic cholangiocarcinoma. *J Gastroenterol Hepatol* **2015**, *30*, 957-963, doi:10.1111/jgh.12843.
  13. Hong, T.S.; Wo, J.Y.; Yeap, B.Y.; Ben-Josef, E.; McDonnell, E.I.; Blaszkowsky, L.S.; Kwak, E.L.; Allen, J.N.; Clark, J.W.; Goyal, L.; et al. Multi-Institutional Phase II Study of High-Dose Hypofractionated Proton Beam Therapy in Patients With Localized, Unresectable Hepatocellular Carcinoma and Intrahepatic Cholangiocarcinoma. *J Clin Oncol* **2016**, *34*, 460-468, doi:10.1200/JCO.2015.64.2710.
  14. Hung, S.P.; Huang, B.S.; Hsieh, C.E.; Lee, C.H.; Tsang, N.M.; Chang, J.T.; Chen, J.S.; Chou, W.C.; Tseng, J.H.; Hong, J.H. Clinical Outcomes of Patients With Unresectable Cholangiocarcinoma Treated With Proton Beam Therapy. *Am J Clin Oncol* **2020**, *43*, 180-186, doi:10.1097/COC.0000000000000646.
  15. Shimizu, S.; Okumura, T.; Oshiro, Y.; Fukumitsu, N.; Fukuda, K.; Ishige, K.; Hasegawa, N.; Numajiri, H.; Murofushi, K.; Ohnishi, K.; et al. Clinical outcomes of previously untreated patients with unresectable intrahepatic cholangiocarcinoma following proton beam therapy. *Radiat Oncol* **2019**, *14*, 241, doi:10.1186/s13014-019-1451-5.
